# Supplementary material for: Circadian Rhythm Regulates Development of Enamel in Mouse Mandibular First Molar
Source: PLoS One. 2016 Aug 5;11(8):e0159946. doi: 10.1371/journal.pone.0159946 (PMC4975438; doi:10.1371/journal.pone.0159946)
Supplement: S2 File — (XLSX) [file pone.0159946.s002.xlsx]

## Sheet: d0
	Average							SD
	MT1	MT2	Amelx					MT1	MT2	Amelx
Control	0.00563697	0.0235262	51.7344				Control	0.00372668	0.0154471	87.0218
Dark	0.123293	2.31018	1.51311				Dark	0.288429	5.59801	2.72183
Light	0.194003	0.114202	422.616				Light	0.320856	0.122995	194.821
PDOT	0.333823	0.335861	0.459953				PDOT	0.576926	0.575161	0.501569

## Sheet: d3
		Average							SD
		MT1	MT2	Amelx					MT1	MT2	Amelx
	Control	0.00501939	0.00972498	2.23778				Control	0.00646273	0.012171	2.68282
	Dark	0.0586551	0.0731025	45.9367				Dark	0.0879778	0.0745204	12.6367
	Light	1.10488	2.07837	419.129				Light	0.883525	1.886	773.305
	PDOT	0.0324919	0.215608	9.44006				PDOT	0.0702867	0.480691	6.59946

## Sheet: d4
		Average							SD
		MT1	MT2	Amelx					MT1	MT2	Amelx
	Control	0.0605262	0.00328863	12.0997				Control	0.0988428	0.00511609	12.9019
	Dark	0.00854025	0.03354	114.689				Dark	0.00589856	0.0150622	76.5105
	Light	0.275806	0.518197	494.579				Light	0.221486	0.675667	326.991
	PDOT	0.00306624	0.00779907	5.33166				PDOT	0.00382535	0.0132346	6.20249
